# Supplementary material
Source: PubMed Central journal article supplement (PMC2875827)
Supplement: en.2010-0089_1.pdf [file en.2010-0089_1.pdf]

## Supplemental Figure 1

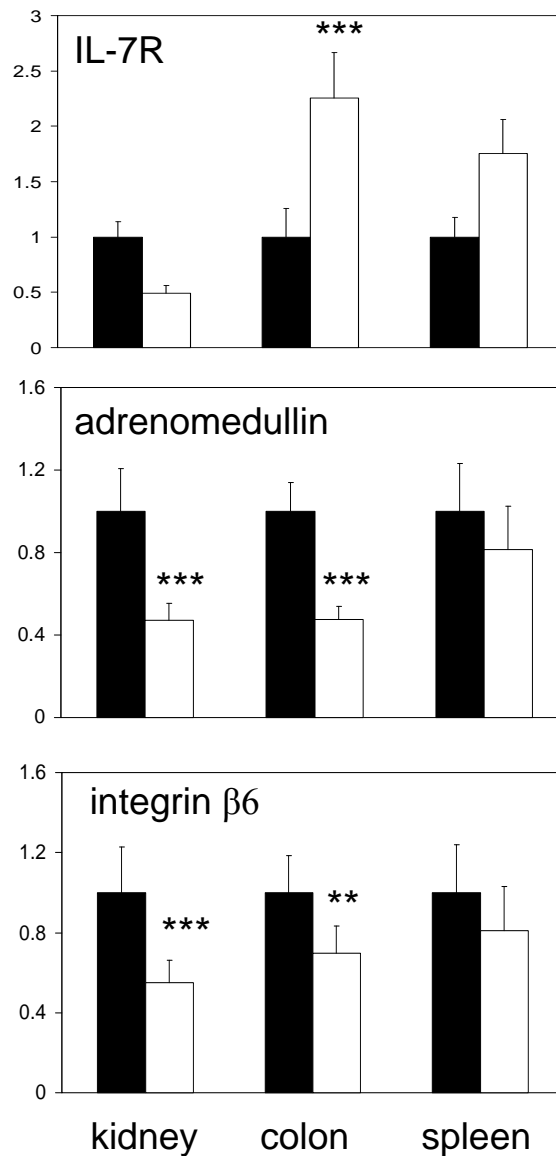

**Validation of differentially expressed genes in kidney, colon and spleen tissue from vitamin D-sufficient (closed bars) vs – deficient mice (open bars).** Values are represented as mean  $\pm$  SEM (N=8) and significantly different as follows: \*\*\* statistically different from corresponding vitamin D-sufficient mice (normal diet),  $p < 0.001$ ; \*\*,  $p < 0.01$ ; \*.
