# Supplementary material
Source: PubMed Central journal article supplement (PMC2875827)
Supplement: en.2010-0089_2.pdf [file en.2010-0089_2.pdf]

**Supplemental Table 1.** Taqman probe and primer sets used for validation of DNA array analysis data

| Gene                                     | Taqman Reference |
|------------------------------------------|------------------|
| angiogenin-4 (Ang4)                      | (Mm01315577_s1)  |
| aquaporin-4 (Aqp4)                       | (Mm00802131_m1)  |
| 5' ecto-nucleotidase (NT5E3/CD73)        | (Mm00501910_m1)  |
| FK506 binding protein-11                 | (Mm00470260_m1)  |
| activating transcription factor-3 (ATF3) | (Mm00476032_m1)  |
| adrenomedullin                           | (Mm00437438_g1)  |
| integrin beta-6                          | (Mm00445326_m1)  |
| pleiomorphic adenoma gene-1 (PLAGL1)     | (Mm00451356_m1)  |
| IL-7 receptor (IL-7R)                    | (Mm00434295_m1)  |
